# Supplementary material
Source: publisher figshare collection journal article supplement (https://tandf.figshare.com/ndownloader/files/13643534)
Supplement: Supplementary file 1 [file 13643534]

**eBird Reviewer Survey Questions**

RespondentID, CollectorID, StartDate, EndDate, IP Address, Email Address, First Name, LastName

How long have you been an eBird reviewer? (years as a number)

What motivates you to be an eBird reviewer? (please list as many reasons as you have)

How many hours do you spend reviewing per week (in a given year)? (please enter a whole number)

Percentage time: Checking invalid data list that has been flagged by filter

Percentage time: Refining/editing entire filters

Percentage time: Exploring database to find unusual observations that the filter has not flagged

Percentage time: Responding to queries about eBird data

Please self assess your expertise for the (primary) region for which you have a reviewing role.

(Resident, Local, Migrant, Vagrant, eBird System)

Key challenges that you face

List some ways that you think your eBird review efforts provide **benefits to science** in the broadest sense (not just data quality).

List some ways that you think your eBird review efforts provide **benefits to conservation.**

List some ways that you think your eBird review efforts provide **social benefits to eBirders and the broader community**.

eBird observers cover the full spectrum of birders. Describe **challenges you face to balance the science, conservation and social benefits of eBird**. In your answer, reflect on any difficult decisions you have had to make to validate/invalidate eBird records.

eBird observers cover the full range of birder skill levels. Describe how much influence your knowledge of the **eBird observer's skill level has on your decision to validate/invalidate**

observations (e.g. a local expert observer compared with a visiting tourist about whom you have no information)?

If possible, can you attribute a % on this level of influence (very high76-100, high 51-75, medium 26-50, low 1-25, no 0)

Consider a situation where you are reviewing a flagged record from an eBird observer who is completely unknown to you. Beyond looking at their checklist itself, do you **seek to further understand their birding "credentials"** (always, most, some, none)

What methods do you use to try and **understand eBirders' birding "credentials**"? Please list some of the ways you investigate this

While making review decisions, how frequently would you **contact other people** to inform your reviewer judgement? (always, most, some, never)

Please write some words to explain your answer, and please list the types of people whose opinion you seek (e.g. other reviewers, guides, friends, other birders)?

How much influence does **mapped bird range** have on your decision to validate / invalidate a flagged observer record? (total 100, very high 76-99, high 51-75, some 26-50, very little 1-25, no 0)

Please provide a short answer to explain your % choice

Please list any **sources of bird range maps**/distribution that you usually refer to for guidance.

Please describe the **ways that you interact with the filters** in your region. Provide details on the types of work you do with filters to improve them.

Please describe **attributes of incoming observer records** that prompt you to revise the filter

settings?

What attributes of eBird filters **don't** work well?

What attributes of eBird filters **do** work well?

Recent improvements have provided the ability to directly upload **photos/audio** into eBird checklists. Please explain some of ways this has impacted on your review efforts.

Thank you for time in completing this survey. If you have any final comments you can add them

here:
